# Supplementary material for: Protein Conformational Dynamics Underlie Selective Recognition of Thermophilic over Mesophilic Enzyme I by a Substrate Analogue
Source: MDPI journal article supplement (doi:10.3390/biom13010160), 2023-01-12
Supplement: s1 [file s1]

## **SUPPLEMENTARY MATERIAL**

### **Protein conformational dynamics underlay selective recognition of thermophilic over mesophilic Enzyme I by a substrate analogue**

Aayushi Singh<sup>1</sup>, Daniel Burns<sup>2</sup>, Sergey L. Sedinkin<sup>1</sup>, Brett VanVeller<sup>1</sup>, Davit A. Potoyan<sup>1,2,\*</sup> and Vincenzo Venditti<sup>1,2,\*</sup>

<sup>1</sup> *Department of Chemistry, Iowa State University, Ames, Iowa 50011, USA.*

<sup>2</sup> *Roy J. Carver Department of Biochemistry, Biophysics and Molecular Biology, Iowa State University, Ames, Iowa 50011, USA.*

\*Address correspondence to:

Vincenzo Venditti, Department of Chemistry, Iowa State University, Hach Hall, 2438 Pammel Drive, Ames, IA 50011, USA. Email: venditti@iastate.edu; Tel: 515-294-1044; Fax: 515-294-7550; ORCID 0000-0001-8734-0400.

Davit A. Potoyan, Department of Chemistry, Iowa State University, Gilman Hall, 2415 Osborn Drive, Ames, IA 50011, USA. Email: potoyan@iastate.edu; Tel: 515-294-9971; Fax: 515-294-7550.

**X**: active site    **X**: conserved residues    — EIN    — EIC    --- active site loops    \*: mutations

|     |     |                                                                                                                                                                                                           |     |
|-----|-----|-----------------------------------------------------------------------------------------------------------------------------------------------------------------------------------------------------------|-----|
| eEI | 1   | MISGILASPGIAFGKALLKEDEIVIDRKKISADQVDQEVEERFLSGRAKASAQLETIKTK                                                                                                                                              | 60  |
| tEI | 1   | MLKGVAASPGIAGKAFLYTKEKVITINVEKIEESKVEEEIAKFRKALEVTQEEIEKIKEK                                                                                                                                              | 60  |
|     |     |                                                                                                                                                                                                           |     |
| eEI | 61  | AGETFGEKEAIFEGHIMLLEDEELEQEIIALIKDKHMTADAAAEVIEGQASALEELDD                                                                                                                                                | 120 |
| tEI | 61  | ALKEFGKEKAEIFEAHLMLASDPELIEGVENMIKTELVTADNAVNVIEQNASVMESLND                                                                                                                                               | 120 |
|     |     |                                                                                                                                                                                                           |     |
| eEI | 121 | EYLKERAADVRDIGKRLLRNILGLKIIDLSAIQDEVILVAADLTTPSETAQNLNKKVLGFI                                                                                                                                             | 180 |
| tEI | 121 | EYLKERAVIDLRDVGNRIENLLGVKS VNLS DLEEVVVIARDLTTPSDTATMKKEMVLGFA                                                                                                                                            | 180 |
|     |     |                                                                                                                                                                                                           |     |
| eEI | 181 | TDAGGRTSHTSIMARSLELPAIVGTGSVTSQVKND DY LILD AVNNQV YVNPTNEVIDKMR                                                                                                                                          | 240 |
| tEI | 181 | TDVGGRTSHTAIMARSLEIPAVVGLGNVTSQVKAGDLVIVDGLEGI VIVNPDEKTVEDYK                                                                                                                                             | 240 |
|     |     |                                                                                                                                                                                                           |     |
| eEI | 241 | AVQEQVAS EKAE LAKL KDL PAITLDGHQVEVCANIGTV <sup>*</sup> *RDVEGAERN GAEGVGLYRTTEFL                                                                                                                         | 300 |
| tEI | 241 | SKKESYEKKVEGLKQLKDLPAETPDGKKVMLAANIGTPKDVASALANGAEGVGLFRTTEFL                                                                                                                                             | 300 |
|     |     |                                                                                                                                                                                                           |     |
| eEI | 301 | *FMDRD <sup>*</sup> ALP <sup>*</sup> T <sup>*</sup> EEEEQAAYKAVAACGSQAVIVRTM <sup>*</sup> DIGGD <sup>*</sup> KELPYM <sup>*</sup> N <sup>*</sup> F <sup>*</sup> PKE <sup>*</sup> ENPF LGW <sup>*</sup> RAI | 360 |
| tEI | 301 | YMDRNSLPSEEEEQFEAYKEVVEKMGRPVTIR <sup>*</sup> TLDIGGD <sup>*</sup> KELPYLDMPKEMNPF LGYRAI                                                                                                                 | 360 |
|     |     |                                                                                                                                                                                                           |     |
|     |     | (res. 296-309) β2a2 loop (res. 332-360)                                                                                                                                                                   |     |
| eEI | 361 | RIAMDRKEIILRDQLRAILRASAFGKLRIMFPMIISVEEVRALRKEIEIYKQELRDEGKAF                                                                                                                                             | 420 |
| tEI | 361 | RLCLDRPDIFKTQLRAILRASAYGNVQIMYPMIS SVEEVRKAN SIL EEVKAELDREGVKY                                                                                                                                           | 420 |
|     |     |                                                                                                                                                                                                           |     |
| eEI | 421 | DESIEIGVMVETPAAATIARHLAKEVDFFSIGTNDLTQYT LAVDR <sup>*</sup> GND <sup>*</sup> M <sup>*</sup> I <sup>*</sup> SH <sup>*</sup> L <sup>*</sup> YQP <sup>*</sup> M <sup>*</sup> S <sup>*</sup> PS               | 480 |
| tEI | 421 | DKEIKVGIMVEIPSAAVTADILAKEVDFFSIGTNDLTQYT LAVDR <sup>*</sup> MNEHVKEYYQPFHPA                                                                                                                               | 480 |
|     |     |                                                                                                                                                                                                           |     |
|     |     | β6a6 loop (res. 454-477)                                                                                                                                                                                  |     |
| eEI | 481 | VLNLIKQVIDASHAEGKW TGMCGELAGDERATLLLLMGGLDEF SMSAISIPRIKKIIRNT                                                                                                                                            | 540 |
| tEI | 481 | ILRLVKMVIDAAHKEGKFAAMCGEMAGDPLAAVILLGLGLDEF SMSATS IPEIKNIIRNV                                                                                                                                            | 540 |
|     |     |                                                                                                                                                                                                           |     |
| eEI | 541 | NFEDAKVLAEQALAQP TTDELMTLVNK FIEEKTIC                                                                                                                                                                     | 575 |
| tEI | 541 | EYEKAKEIAEKALNMSEAREIEKMMKDVI--KDIG                                                                                                                                                                       | 573 |

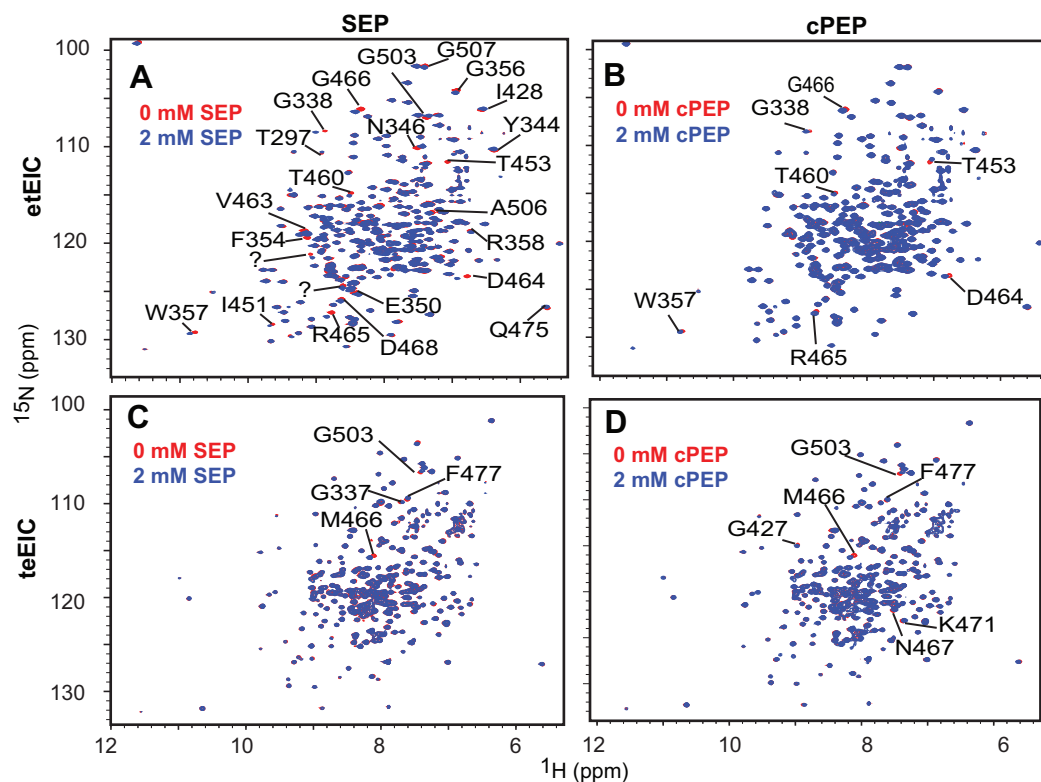

**Figure S2.** 800 MHz  $^1\text{H}$ - $^{15}\text{N}$  TROSY spectra of etEIC and teEIC measured in the absence (red) and in the presence (blue) of 2 mM SEP or cPEP. Panels (A), (B), (C), and (D) display the data measured for the etEIC-SEP, etEIC-cPEP, teEIC-SEP, and teEIC-cPEP systems, respectively. Peaks that shift upon addition of ligand are assigned in the spectra. “?” indicates peaks with unknown assignment.

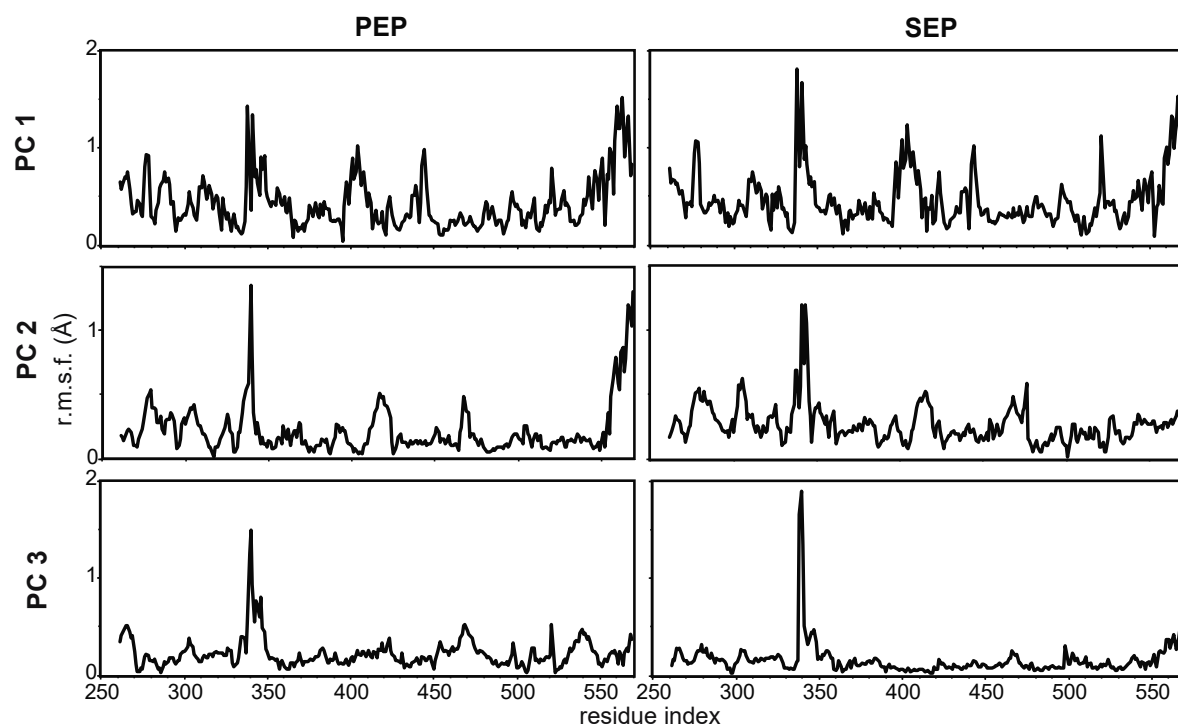

**Figure S3.** Residue-specific r.m.s.f. values (relative to the average structure) in PC 1 (top), PC 2 (middle), and PC 3 (bottom) calculated over the concatenated trajectory of the EIC-PEP (left) and EIC-SEP (right) complexes are plotted versus the residue index to emphasize the specific contribution of different EIC regions to each PC.
